# Supplementary material for: Hansen solubility parameters as a useful tool in searching for solvents for soy proteins
Source: Royal Society of Chemistry journal article supplement (doi:10.1039/c4ra09115a), 2014-11-19
Supplement: c4ra09115a1.pdf [file c4ra09115a1.pdf]

## † Electronic supplementary information (ESI)

HSPs of the mixtures were calculated by:

$$\delta_x = \sum_{i=1}^n a_i \cdot \delta_{i,x}$$

Where  $\delta_x$  is a partial solubility parameter component of a mixture,  $n$ , number of solutions in the mixture,  $a_i$ , volume fraction of a solvent in the mixture and  $\delta_{i,x}$  represents a partial solubility parameter component of a solvent in the mixture.

**Table 1.** Solvent systems compositions

| Sample No. | Solvent 1 (Vol. %)       | Solvent 2 (Vol. %)  | Solvent 3 (Vol. %) | Solvent 4 (Vol. %) | $\delta_d$ | $\delta_p$ | $\delta_h$ | $R$   |
|------------|--------------------------|---------------------|--------------------|--------------------|------------|------------|------------|-------|
| 1          | 100% 2-chloroethanol     |                     |                    |                    | 17.21      | 11.24      | 17.49      | 21.21 |
| 2          | 100% 2-butanol           |                     |                    |                    | 15.8       | 5.7        | 14.5       | 26.06 |
| 3          | 100% 1,4-dioxane         |                     |                    |                    | 17.5       | 1.8        | 9.0        | 32.61 |
| 4          | 100% DMSO                |                     |                    |                    | 18.4       | 16.4       | 10.2       | 27.91 |
| 5          | 100% ethanol             |                     |                    |                    | 15.8       | 8.8        | 19.4       | 20.35 |
| 6          | 100% 2-propanol          |                     |                    |                    | 15.8       | 6.1        | 16.4       | 24.18 |
| 7          | 100% n-butanol           |                     |                    |                    | 16         | 5.7        | 15.8       | 24.85 |
| 8          | 100% formamide           |                     |                    |                    | 17.2       | 26.2       | 19.0       | 21.21 |
| 9          | 100% n-methylacetamide   |                     |                    |                    | 16.9       | 17.0       | 13.0       | 24.98 |
| 10         | 100% triethanol amine    |                     |                    |                    | 17.3       | 7.6        | 21.0       | 19.28 |
| 11         | 100% 2-pyrrolidone       |                     |                    |                    | 18.2       | 12.0       | 9.0        | 29.45 |
| 12         | 100% propylene carbonate |                     |                    |                    | 20.0       | 18.0       | 4.1        | 34.41 |
| 13         | 100% glycerol Carbonate  |                     |                    |                    | 17.9       | 25.5       | 17.4       | 22.43 |
| 14         | 100% urea                |                     |                    |                    | 20.9       | 18.7       | 26.4       | 14.05 |
| 15         | 60% water                | 20% 2-chloroethanol | 20% 2-butanol      |                    | 15.96      | 12.99      | 31.78      | 7.55  |
| 16         | 60% water                | 20% 2-chloroethanol | 20% 1,4-dioxane    |                    | 16.30      | 12.21      | 30.68      | 8.71  |
| 17         | 60% water                | 20% 2-chloroethanol | 20% DMSO           |                    | 16.48      | 15.13      | 30.92      | 7.32  |
| 18         | 60% water                | 20% 2-chloroethanol | 20% ethanol        |                    | 15.96      | 13.61      | 32.76      | 6.45  |
| 19         | 60% water                | 20% 2-chloroethanol | 20% 2-propanol     |                    | 15.96      | 13.07      | 32.16      | 7.20  |
| 20         | 60% water                | 20% 2-chloroethanol | 20% 2-butanol      |                    | 16.00      | 12.99      | 32.04      | 7.32  |
| 27         | 40% water                | 20% 2-chloroethanol | 20% 1,4-dioxane    | 20% 2-butanol      | 16.34      | 10.15      | 25.12      | 14.51 |
| 28         | 40% water                | 40% 2-chloroethanol | 20% 1,4-dioxane    |                    | 16.62      | 11.26      | 25.72      | 13.45 |
| 29         | 40% water                | 40% 2-chloroethanol | 20% 2-butanol      |                    | 16.28      | 12.04      | 26.82      | 12.20 |
| 30         | 40% water                | 40% 2-chloroethanol | 10% 2-butanol      | 10% 1,4-dioxane    | 16.45      | 11.65      | 26.27      | 12.82 |
| 31         | 40% water                | 20% 2-chloroethanol | 20% DMSO           | 20% 1,4-dioxane    | 16.86      | 12.29      | 24.26      | 14.42 |
| 32         | 40% water                | 20% 2-chloroethanol | 20% ethanol        | 20% 1,4-dioxane    | 16.34      | 10.77      | 26.10      | 13.36 |
| 33         | 40% water                | 20% 2-chloroethanol | 20% ethanol        | 20% 2-butanol      | 16.00      | 11.55      | 27.20      | 12.14 |

|    |           |                       |                     |                     |       |       |       |       |
|----|-----------|-----------------------|---------------------|---------------------|-------|-------|-------|-------|
| 34 | 40% water | 20% 2-chloroethanol   | 20% DMSO            | 20% propanol        | 16.52 | 13.15 | 25.74 | 12.79 |
| 35 | 40% water | 20% 2-chloroethanol   | 20% ethanol         | 20% propanol        | 16.00 | 11.63 | 27.58 | 11.77 |
| 36 | 40% water | 20% DMSO              | 20% 2-butanol       | 20% 1,4-dioxane     | 16.58 | 11.18 | 23.66 | 15.38 |
| 37 | 60% water | 20% DMSO              | 20% 2-butanol       |                     | 16.20 | 14.02 | 30.32 | 8.29  |
| 38 | 60% water | 20% DMSO              | 10% 2-butanol       | 10% 1,4-dioxane     | 16.37 | 13.63 | 29.77 | 8.87  |
| 39 | 60% water | 20% 2-butanol         | 10% DMSO            | 10% 1,4-dioxane     | 16.11 | 12.56 | 30.20 | 9.02  |
| 40 | 60% water | 20% 1,4-dioxane       | 10% DMSO            | 10% sec-butanol     | 16.28 | 12.17 | 29.65 | 9.61  |
| 41 | 60% water | 20% DMSO              | 10% 2-propanol      | 10% 1,4-dioxane     | 16.37 | 13.67 | 29.96 | 8.68  |
| 42 | 60% water | 20% propanol          | 10% DMSO            | 10% 1,4-dioxane     | 16.11 | 12.64 | 30.58 | 8.65  |
| 43 | 60% water | 20% DMSO              | 10% ethanol         | 10% 1,4-dioxane     | 16.37 | 13.94 | 30.26 | 8.31  |
| 44 | 60% water | 20% ethanol           | 10% DMSO            | 10% 1,4-dioxane     | 16.11 | 13.18 | 31.18 | 7.89  |
| 45 | 60% water | 20% 1,4-dioxane       | 10% ethanol         | 10% DMSO            | 16.28 | 12.48 | 30.14 | 9.04  |
| 46 | 60% water | 20% 2-butanol         | 10% 2-propanol      | 10% ethanol         | 15.68 | 12.23 | 31.86 | 8.06  |
| 47 | 40% water | 20% DMSO              | 20% 2-butanol       | 20% 1,4-dioxane     | 16.58 | 11.18 | 23.66 | 15.38 |
| 48 | 40% water | 40% 2-chloroethanol   | 20% 1,4-dioxane     |                     | 16.62 | 11.26 | 25.72 | 13.45 |
| 49 | 40% water | 40% 2-chloroethanol   | 20% 2-butanol       |                     | 16.28 | 12.04 | 26.82 | 12.20 |
| 50 | 40% water | 40% 2-chloroethanol   | 10% 2-butanol       | 10% 1,4-dioxane     | 16.45 | 11.65 | 26.27 | 12.82 |
| 51 | 40% water | 20% DMSO              | 20% 2-butanol       | 20% 1,4-dioxane     | 16.62 | 14.25 | 26.02 | 12.24 |
| 52 | 60% water | 20% DMSO              | 20% 2-butanol       |                     | 16.86 | 15.28 | 24.56 | 13.50 |
| 53 | 60% water | 20% DMSO              | 10% 2-butanol       | 10% 1,4-dioxane     | 16.34 | 13.14 | 25.42 | 13.13 |
| 54 | 60% water | 20% 1,4-dioxane       | 10% DMSO            | 10% sec-butanol     | 16.80 | 17.17 | 26.26 | 11.73 |
| 55 | 60% water | 20% DMSO              | 10% 2-propanol      | 10% 1,4-dioxane     | 16.62 | 17.24 | 26.32 | 11.70 |
| 56 | 60% water | 20% 2-propanol        | 10% DMSO            | 10% 1,4-dioxane     | 16.28 | 18.02 | 27.42 | 10.74 |
| 57 | 40% water | 40% formamide         | 20% DMSO            |                     | 16.80 | 20.16 | 26.56 | 11.93 |
| 58 | 60% water | 40% formamide         |                     |                     | 16.24 | 19.48 | 32.98 | 5.92  |
| 59 | 60% water | 20% formamide         | 20% 2-butanol       |                     | 15.96 | 15.98 | 32.08 | 6.32  |
| 60 | 60% water | 20% formamide         | 20% 1,4-dioxane     |                     | 16.60 | 15.20 | 30.66 | 7.52  |
| 61 | 40% water | 20% n-methylacetamide | 20% 2-chloroethanol | 20% 1,4-dioxane     | 16.56 | 12.41 | 24.82 | 13.88 |
| 62 | 40% water | 20% n-methylacetamide | 20% DMSO            | 20% 1,4-dioxane     | 16.80 | 13.44 | 23.36 | 14.99 |
| 63 | 40% water | 20% n-methylacetamide | 20% 2-butanol       | 20% 1,4-dioxane     | 16.28 | 11.30 | 24.22 | 14.87 |
| 64 | 40% water | 20% n-methylacetamide | 20% DMSO            | 20% 2-chloroethanol | 16.74 | 15.33 | 25.06 | 13.01 |
| 65 | 40% water | 40% n-methylacetamide | 20% 1,4-dioxane     |                     | 16.50 | 13.56 | 23.92 | 14.45 |
| 66 | 40% water | 40% n-methylacetamide | 20% 2-butanol       |                     | 16.16 | 14.34 | 25.02 | 13.29 |
| 67 | 40% water | 40% n-methylacetamide | 20% DMSO            |                     | 16.68 | 16.48 | 24.16 | 13.84 |
| 68 | 60% water | 40% n-methylacetamide |                     |                     | 16.12 | 17.08 | 30.94 | 7.28  |
| 69 | 60% water | 20% n-methylacetamide | 20% 2-butanol       |                     | 15.90 | 14.48 | 31.06 | 7.62  |
| 70 | 60% water | 20% n-methylacetamide | 20% 1,4-dioxane     |                     | 16.54 | 13.70 | 29.64 | 8.92  |
| 71 | 60% water | 20% formamide         | 20% 2-butanol       |                     | 15.96 | 15.98 | 32.08 | 6.32  |
| 72 | 60% water | 20% formamide         | 20% 1,4-dioxane     |                     | 16.30 | 15.20 | 30.98 | 7.31  |
| 73 | 40% water | 20% formamide         | 20% 2-chloroethanol | 20% 1,4-dioxane     | 16.62 | 14.25 | 26.02 | 12.24 |

|     |           |                       |                         |                     |       |       |       |       |
|-----|-----------|-----------------------|-------------------------|---------------------|-------|-------|-------|-------|
| 74  | 40% water | 20% formamide         | 20% DMSO                | 20% 1,4-dioxane     | 16.86 | 15.28 | 24.56 | 13.50 |
| 75  | 40% water | 20% formamide         | 20% 2-butanol           | 20% 1,4-dioxane     | 16.86 | 15.28 | 24.56 | 13.50 |
| 76  | 40% water | 20% formamide         | 20% DMSO                | 20% 2-chloroethanol | 18.24 | 9.54  | 17.28 | 22.04 |
| 77  | 40% water | 40% formamide         | 20% 1,4-dioxane         |                     | 17.50 | 8.86  | 15.48 | 23.85 |
| 78  | 40% water | 40% formamide         | 20% 2-butanol           |                     | 17.92 | 7.36  | 12.82 | 26.90 |
| 79  | 40% water | 40% formamide         | 20% DMSO                |                     | 18.10 | 7.50  | 17.28 | 22.76 |
| 80  | 60% water | 20% formamide         | 20% 2-butanol           |                     | 17.88 | 8.52  | 15.22 | 24.25 |
| 81  | 60% water | 20% formamide         | 20% 1,4-dioxane         |                     | 17.46 | 10.02 | 17.88 | 21.20 |
| 82  | 40% water | 20% n-methylacetamide | 20% 2-chloroethanol     | 20% 1,4-dioxane     | 16.56 | 12.41 | 24.82 | 13.88 |
| 83  | 40% water | 20% n-methylacetamide | 20% DMSO                | 20% 1,4-dioxane     | 16.80 | 13.44 | 23.36 | 14.99 |
| 84  | 40% water | 20% n-methylacetamide | 20% 2-butanol           | 20% 1,4-dioxane     | 16.28 | 11.30 | 24.22 | 14.87 |
| 85  | 40% water | 20% n-methylacetamide | 20% DMSO                | 20% 2-chloroethanol | 16.74 | 15.33 | 25.06 | 13.01 |
| 86  | 40% water | 40% n-methylacetamide | 20% 1,4-dioxane         |                     | 16.50 | 13.56 | 23.92 | 14.45 |
| 87  | 40% water | 40% n-methylacetamide | 20% 2-butanol           |                     | 16.16 | 14.34 | 25.02 | 13.29 |
| 88  | 40% water | 40% n-methylacetamide | 20% DMSO                |                     | 16.68 | 16.48 | 24.16 | 13.84 |
| 89  | 60% water | 40% n-methylacetamide |                         |                     | 16.12 | 16.40 | 30.58 | 7.63  |
| 90  | 60% water | 20% n-methylacetamide | 20% 2-butanol           |                     | 15.90 | 14.14 | 30.88 | 7.89  |
| 91  | 60% water | 20% n-methylacetamide | 20% 1,4-dioxane         |                     | 16.24 | 13.36 | 29.78 | 9.00  |
| 92  | 60% water | 20% n-methylformamide | 20% 2-chloroethanol     |                     | 16.18 | 15.25 | 31.48 | 6.88  |
| 93  | 60% water | 20% n-methylformamide | 20% DMSO                |                     | 17.20 | 13.78 | 23.62 | 14.66 |
| 94  | 60% water | 20% n-methylformamide | 20% 2-butanol           |                     | 15.90 | 14.14 | 30.88 | 7.89  |
| 95  | 60% water | 20% n-methylformamide | 20% DMSO                |                     | 16.42 | 16.28 | 30.02 | 8.06  |
| 96  | 40% water | 40% n-methylformamide | 20% 1,4-dioxane         |                     | 16.50 | 13.56 | 23.92 | 14.45 |
| 97  | 40% water | 40% n-methylformamide | 20% 2-butanol           |                     | 16.36 | 15.06 | 26.18 | 11.99 |
| 98  | 40% water | 40% n-methylformamide | 20% DMSO                |                     | 16.88 | 17.20 | 25.32 | 12.67 |
| 99  | 60% water | 40% n-methylformamide |                         |                     | 16.32 | 17.12 | 31.74 | 6.41  |
| 100 | 60% water | 20% n-methylformamide | 20% 2-butanol           |                     | 15.90 | 14.14 | 30.88 | 7.89  |
| 101 | 60% water | 20% n-methylformamide | 20% 1,4-dioxane         |                     | 16.64 | 13.72 | 30.04 | 8.52  |
| 102 | 60% water | 25% triethanol amine  | 15% 2pyrrolidone        |                     | 16.72 | 17.81 | 33.00 | 5.13  |
| 103 | 60% water | 15% triethanolamine   | 25% 2pyrrolidone        |                     | 16.90 | 17.31 | 31.70 | 6.31  |
| 104 | 60% water | 40% 2pyrrolidone      |                         |                     | 17.12 | 16.56 | 30.00 | 7.98  |
| 105 | 70% water | 30% 2pyrrolidone      |                         |                     | 16.74 | 16.42 | 33.00 | 5.02  |
| 106 | 60% water | 25% triethanol amin   | 15% propylene carbonate |                     | 16.81 | 17.90 | 32.00 | 6.11  |
| 107 | 50% water | 25% triethanol amine  | 25% 2pyrrolidone        |                     | 17.10 | 17.95 | 29.55 | 8.51  |
| 108 | 70% water | 30% triethanol amine  |                         |                     | 16.26 | 17.92 | 36.30 | 2.58  |

|     |            |                            |                            |       |       |       |      |
|-----|------------|----------------------------|----------------------------|-------|-------|-------|------|
| 109 | 60% water  | 40% triethanol amine       |                            | 16.50 | 18.56 | 34.70 | 3.90 |
| 110 | 50% water  | 50% triethanol amine       |                            | 16.70 | 19.20 | 33.00 | 5.60 |
| 111 | 70% water  | 20% triethanol amine       | 10% 1,4-dioxane            | 16.40 | 15.90 | 35.00 | 3.34 |
| 112 | 60% water  | 30% triethanol amine       | 10% 1,4-dioxane            | 16.60 | 16.50 | 33.20 | 4.86 |
| 113 | 75% Water  | 15% Glycerol<br>Carbonate  | 10% Propylene<br>Carbonate | 16.20 | 17.40 | 35.60 | 2.99 |
| 114 | 85% water  | 15% propylene<br>carbonate |                            | 16.00 | 16.70 | 37.70 | 2.10 |
| 115 | 100% water |                            |                            | 15.60 | 16.00 | 42.30 | 5.25 |
| 116 | 1 M urea   |                            |                            | 15.84 | 16.12 | 41.58 | 4.38 |
| 117 | 2 M urea   |                            |                            | 16.08 | 16.25 | 40.85 | 3.49 |
| 118 | 3 M urea   |                            |                            | 16.32 | 16.37 | 40.14 | 2.62 |
| 119 | 4 M urea   |                            |                            | 16.56 | 16.49 | 39.41 | 1.73 |
| 120 | 5 M urea   |                            |                            | 16.80 | 16.61 | 38.69 | 0.87 |
| 121 | 6 M urea   |                            |                            | 17.04 | 16.73 | 37.98 | 0.01 |
